# Supplementary material
Source: Springer Nature journal article supplement (https://www.springermedizin.de/resource/supplementary/13017_2008_95_MOESM1_ESM.pdf/9635458)

09-01-1944 M  
01-033378  
12-04-2001

Sez Vascolare

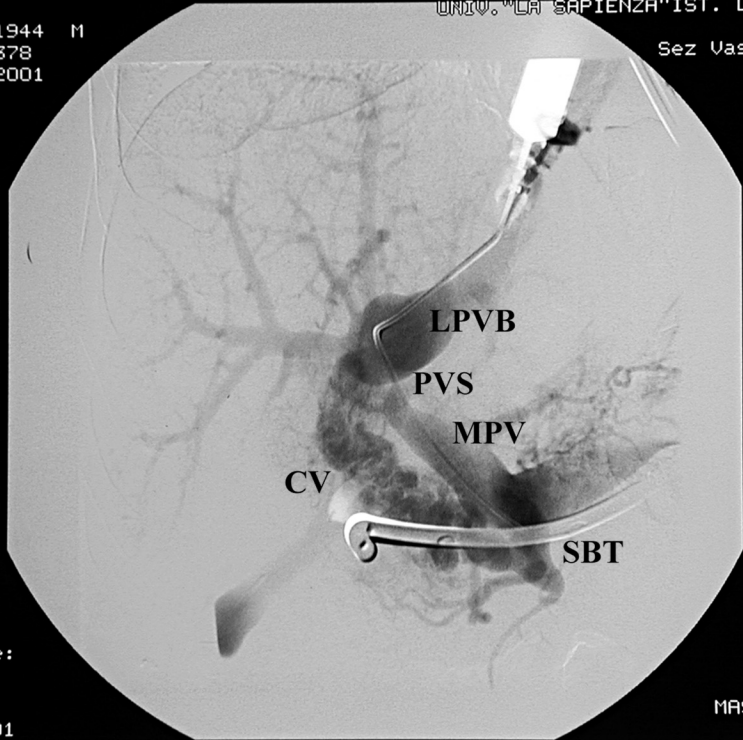

ROT  
8

ANG  
20

T-mask:  
0.52  
T-image:  
4.68  
T-run:  
10:28:01

RUN  
6  
13  
MASK IMAGE  
2 10

Supplement: MOESM1 [file 9635458]
